# Supplementary material for: Evaluation of the Base Stability of Hydrophilic Interaction Chromatography Columns Packed with Silica or Ethylene-Bridged Hybrid Particles
Source: MDPI journal article supplement (doi:10.3390/separations9060146), 2022-06-08
Supplement: s1 [file s1]

Supporting Information for

# **Evaluation of the Base Stability of Hydrophilic Interaction Chromatography Columns Packed with Silica or Ethylene-Bridged Hybrid Particles**

Thomas H. Walter\*, Bonnie A. Alden and Kenneth Berthelette

Waters Corporation, 34 Maple Street, Milford, MA

\*Corresponding Author

Tel.: (508) 498-9633. Email: tom\_walter@waters.com.

## **Table of Contents**

|                                                                                                                                                                                     |
|-------------------------------------------------------------------------------------------------------------------------------------------------------------------------------------|
| Page S2 - Figure S1: Effect of the water concentration of the challenge solution on retention factor stability for CORTECS HILIC columns                                            |
| Page S3 - Figure S2: Effect of the pH of the challenge solution on retention factor stability for CORTECS HILIC columns                                                             |
| Page S4 - Figure S3: Effect of temperature on retention factor stability for CORTECS HILIC columns                                                                                  |
| Page S5 - Figure S4: Retention factor stability for three unbonded silica or BEH columns exposed to $\text{pH } 10.87 \text{ } 60/40 \text{ ACN/AmBic (aq) at } 70^\circ\text{C}$   |
| Page S6 - Figure S5: Retention factor stability for two unbonded solid-core silica columns exposed to $\text{pH } 10.87 \text{ } 60/40 \text{ ACN/AmBic (aq) at } 70^\circ\text{C}$ |
| Page S7 - Figure S6: Retention factor stability for three bonded silica or BEH columns exposed to $\text{pH } 10.87 \text{ } 60/40 \text{ ACN/AmBic (aq) at } 70^\circ\text{C}$     |
| Page S8 - Figure S7: Photographs of the inlet ends of the packed beds for two columns after base stability evaluation                                                               |

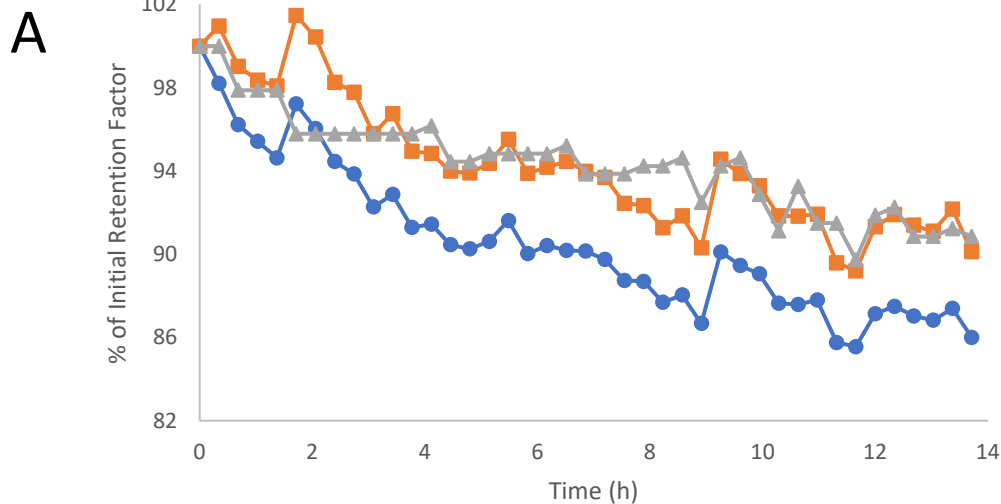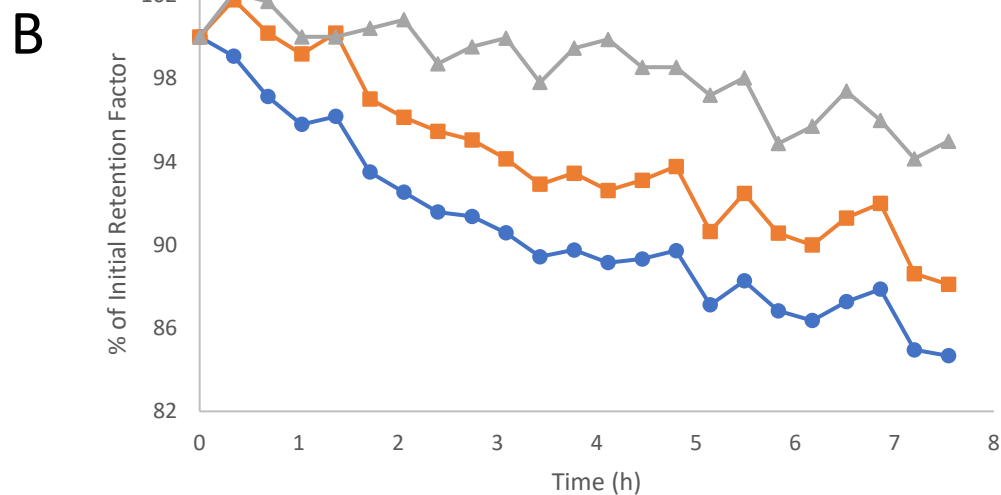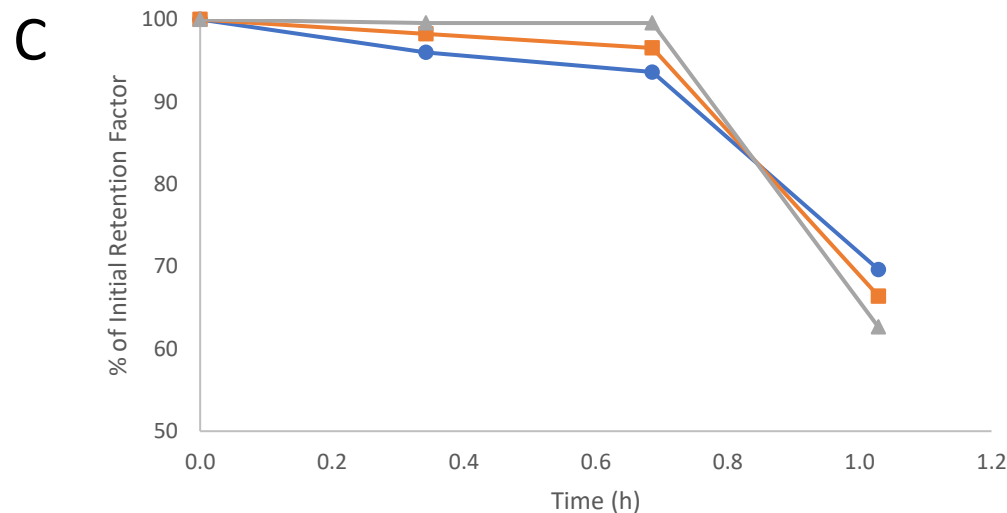

Figure S1: Effect of the water concentration of the challenge solution on the stability of 2.1 x 50 mm 1.6  $\mu$ m CORTECS HILIC columns, shown as % of initial retention factor vs time exposed to the basic solution (blue circles – adenine, orange squares – cytosine, grey triangles – TS). The columns were exposed at 70°C to solutions containing acetonitrile and an aqueous  $w$ pH 11.00 ammonium bicarbonate buffer: (A) 20% water,  $s$ pH 10.11, (B) 40% water,  $s$ pH 10.37, (C) 60% water,  $s$ pH 10.54.

A

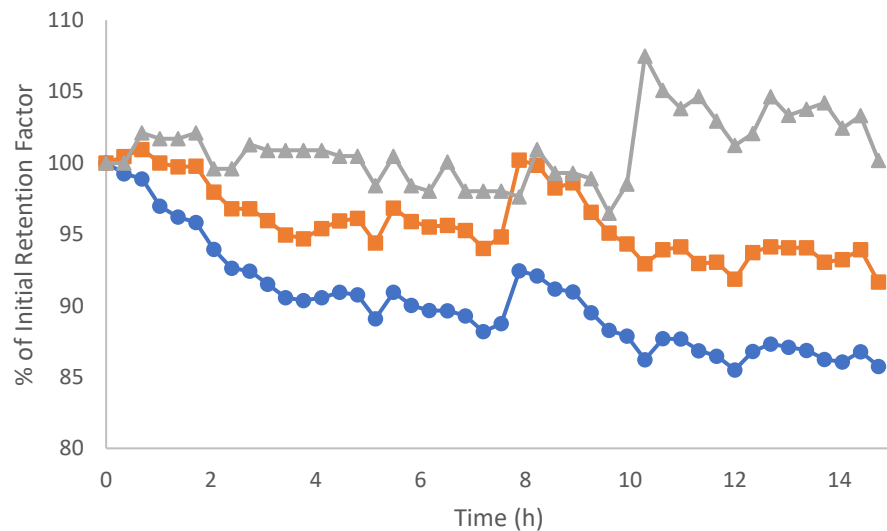

B

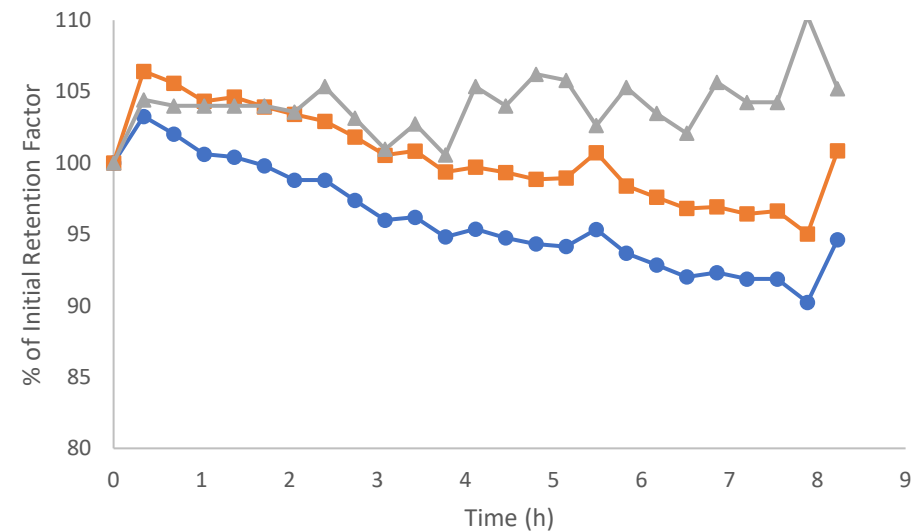

Figure S2: Effect of the pH of the challenge solution on the stability of 2.1 x 50 mm 1.6  $\mu$ m CORTECS HILIC columns, shown as % of initial retention factor vs time exposed to the basic solution (blue circles – adenine, orange squares – cytosine, grey triangles - TS). The columns were exposed at 70°C to solutions containing acetonitrile and different aqueous buffers, with a 60/40 v/v ACN/water ratio: (A) ammonium acetate,  $s_w$ pH 6.99, (B) ammonium bicarbonate,  $s_w$ pH 8.96

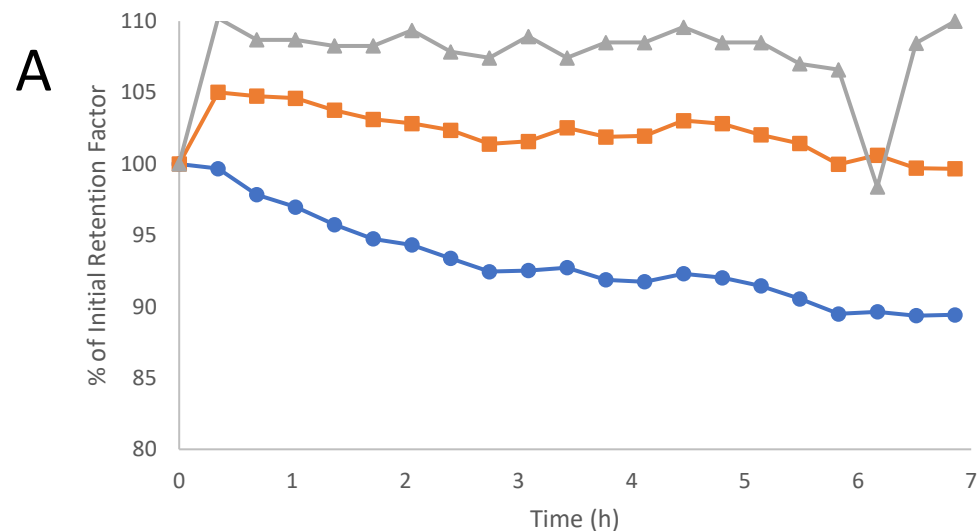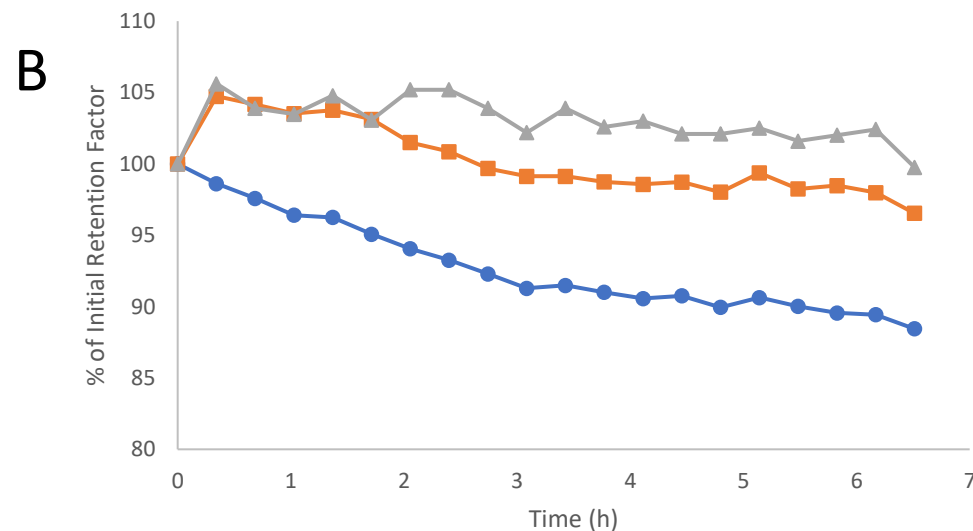

Figure S3: Effect of temperature on the stability of 2.1 x 50 mm 1.6  $\mu$ m CORTECS HILIC columns, shown as % of initial retention factor vs time exposed to the basic solution (blue circles – adenine, orange squares – cytosine, grey triangles - TS). The columns were exposed to a  $w^s$ pH 10.37 solution containing acetonitrile and aqueous ammonium bicarbonate, with a 60/40 v/v ACN/water ratio: (A) 30°C, (B) 50°C

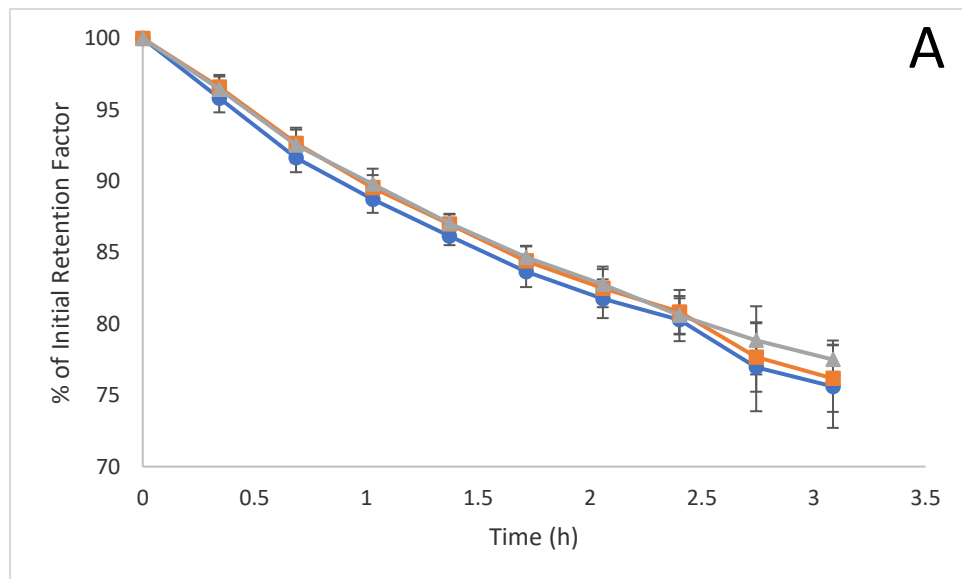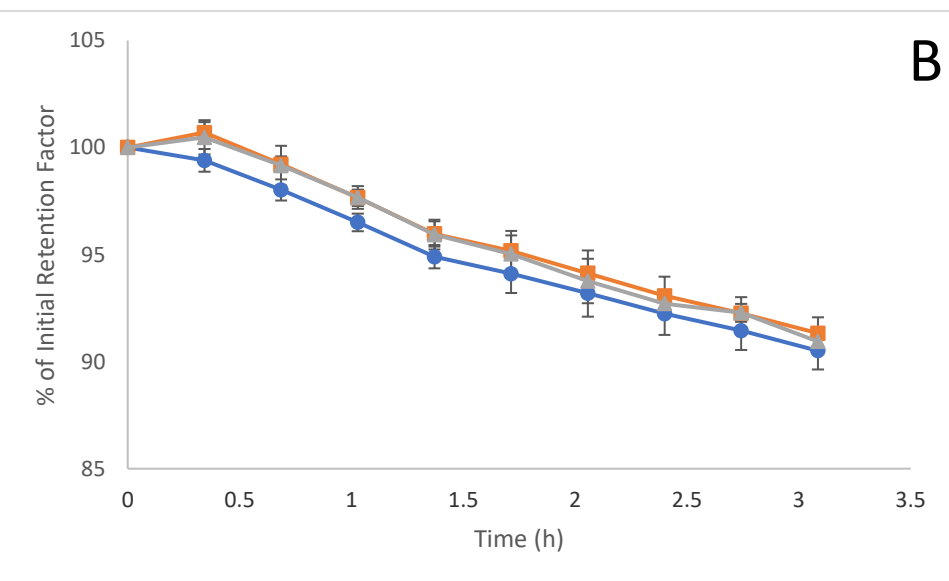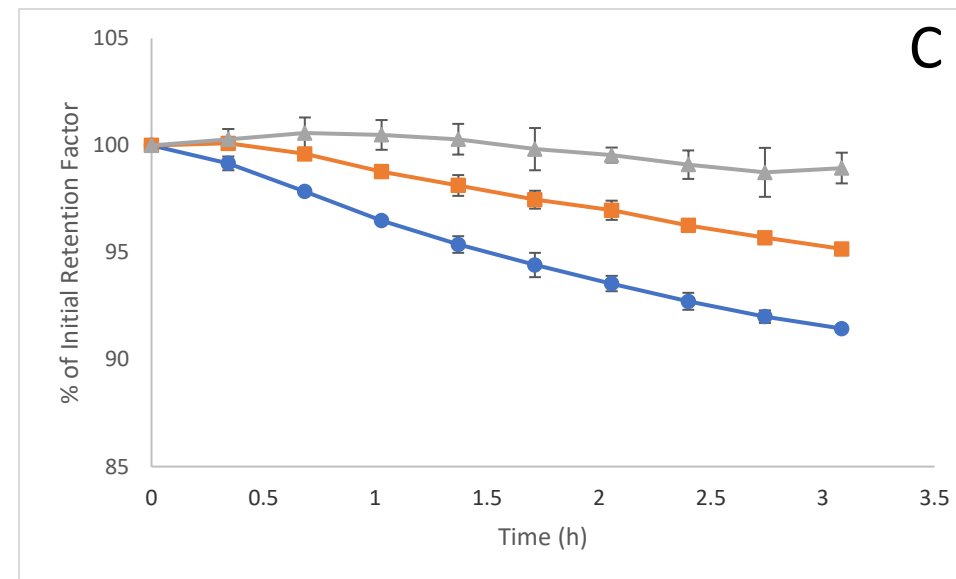

Figure S4: Accelerated stability test results for three different unbonded silica or BEH columns shown as % of initial retention factor vs time exposed to the basic solution (blue circles – adenine, orange squares – cytosine, grey triangles – thymine). The columns were exposed at 70°C to a solution containing acetonitrile and aqueous  $w$ pH 11.30 ammonium bicarbonate, with a 60/40 v/v ACN/water ratio,  $s$ pH 10.87: (A) Ascentis Si, (B) Atlantis HILIC, (C) BEH HILIC. The average results for three replicate columns are shown with error bars indicating  $\pm$  one standard deviation

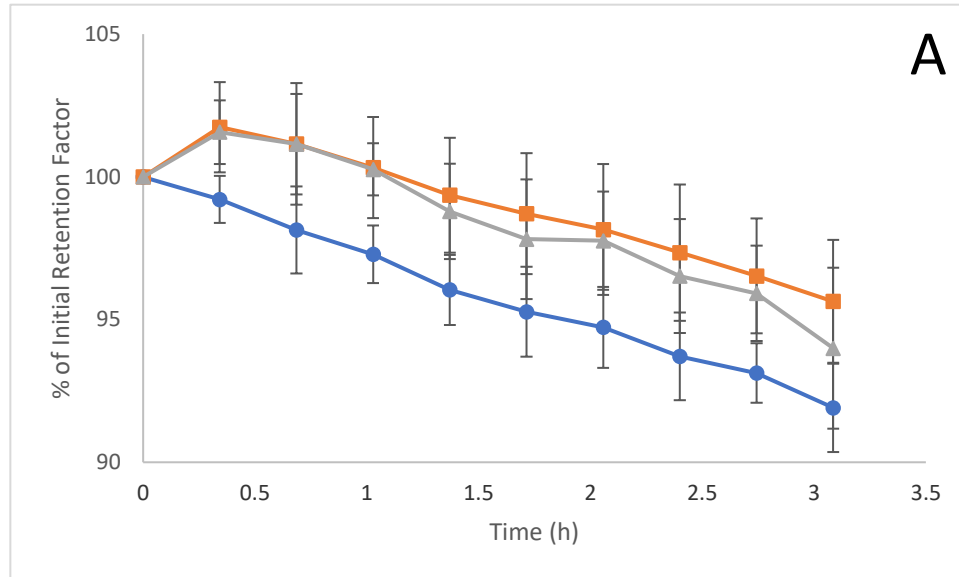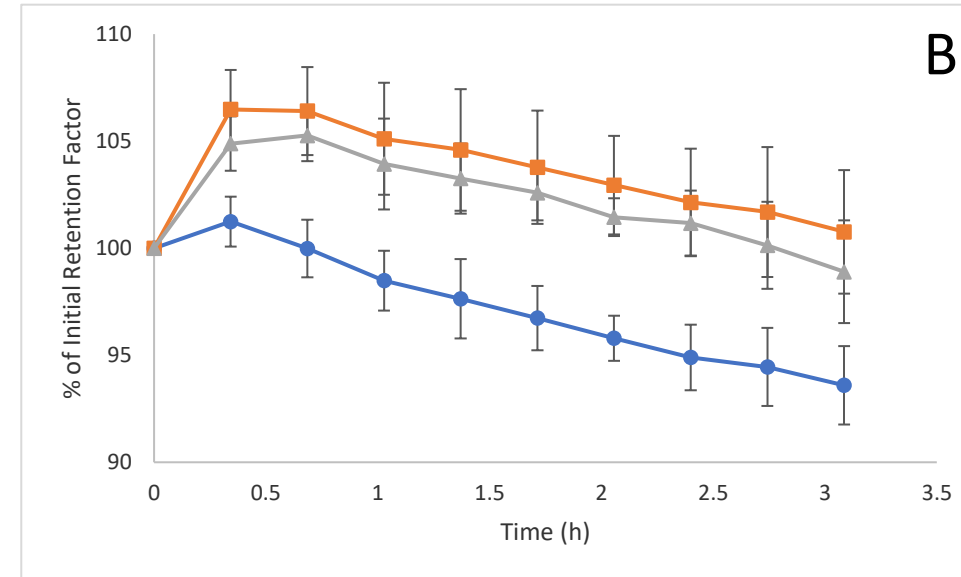

Figure S5: Accelerated stability test results for two different unbonded solid-core silica columns shown as % of initial retention factor vs time exposed to the basic solution (blue circles – adenine, orange squares – cytosine, grey triangles – thymine). The columns were exposed at 70°C to a solution containing acetonitrile and aqueous  $w$ pH 11.30 ammonium bicarbonate, with a 60/40 v/v ACN/water ratio,  $s$ pH 10.87: (A) Accucore HILIC, (B) CORTECS HILIC. The average results for three replicate columns are shown with error bars indicating  $\pm$  one standard deviation

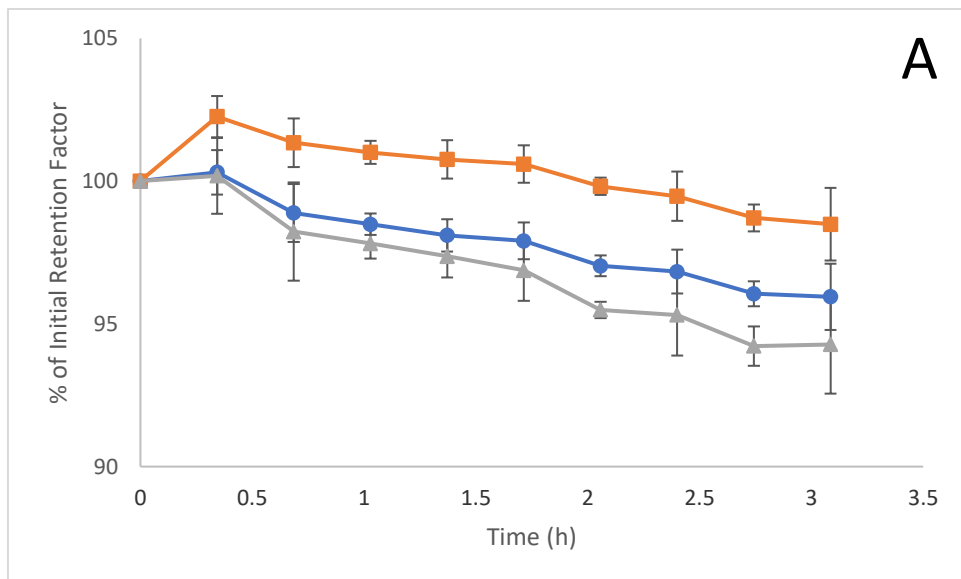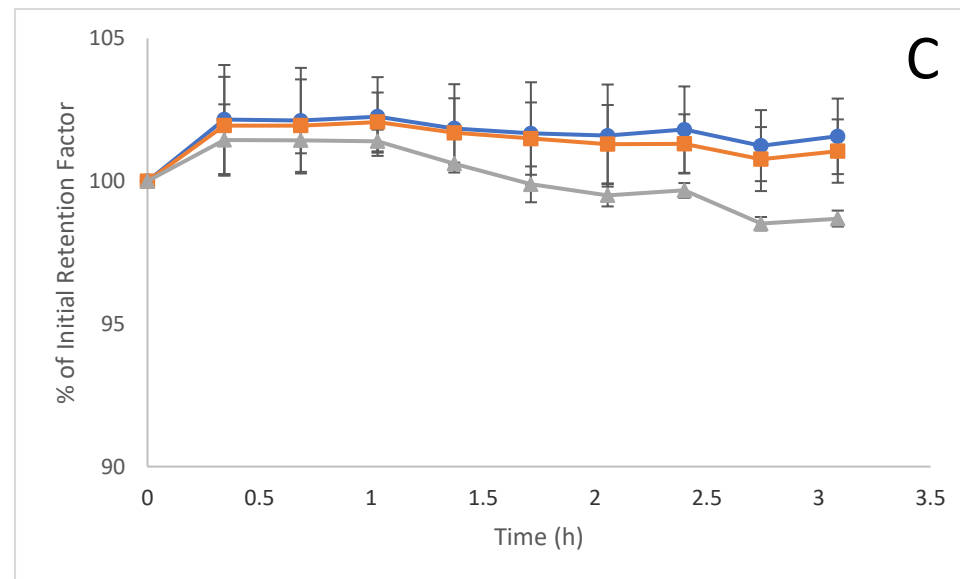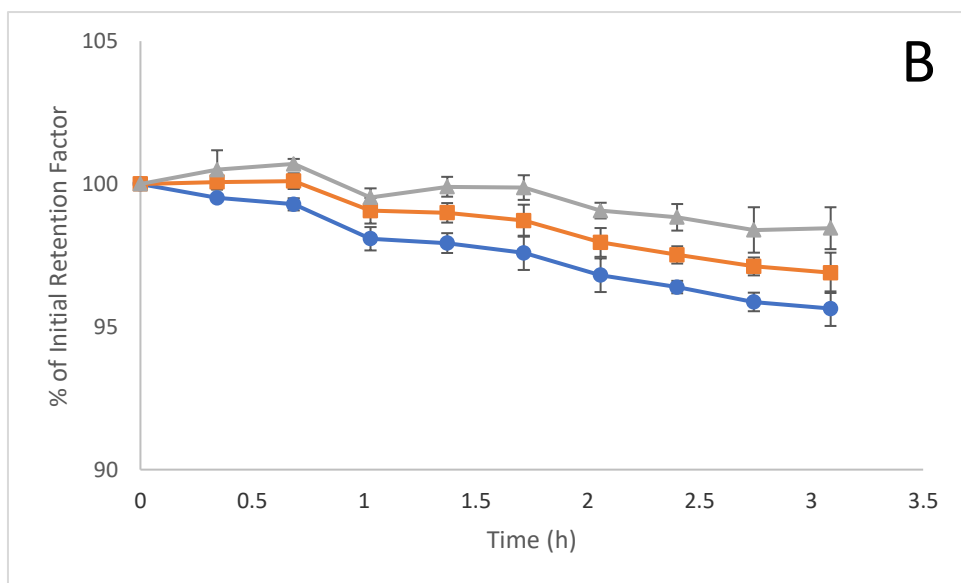

Figure S6: Accelerated stability test results for three different bonded silica or BEH columns shown as % of initial retention factor vs time exposed to the basic solution (blue circles – adenine, orange squares – cytosine, grey triangles – thymine). The columns were exposed at 70°C to a solution containing acetonitrile and aqueous  $w$ pH 11.30 ammonium bicarbonate, with a 60/40 v/v ACN/water ratio,  $s$ pH 10.87: (A) TSKgel Amide-80, (B) SeQuant ZIC-HILIC, (C) BEH Amide. The average results for three replicate columns are shown with error bars indicating  $\pm$  one standard deviation

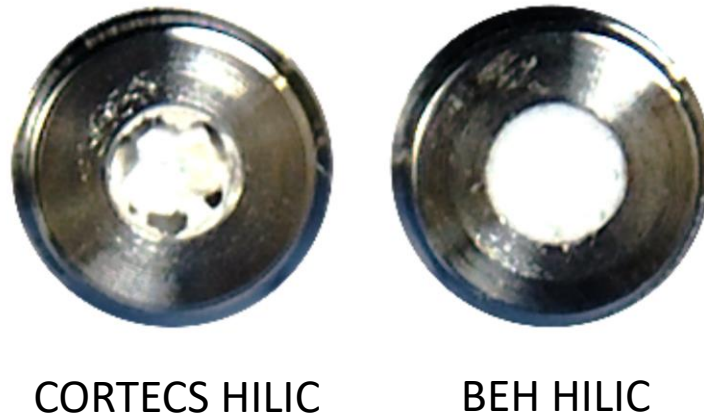

Figure S7: Photographs of the inlet ends of two columns (end fittings removed) after accelerated base stability tests, showing voids in the CORTECS HILIC column. The columns were exposed for 3.09 h at 70°C to a solution containing acetonitrile and aqueous  $w$ pH 11.30 ammonium bicarbonate, with a 60/40 v/v ACN/water ratio,  $s$ pH 10.87
